# Supplementary material
Source: PubMed Central journal article supplement (PMC8855962)
Supplement: NIHMS1772990-supplement-1.pdf [file NIHMS1772990-supplement-1.pdf]

**Supplementary Table 1.** Item-level frequencies of the Luganda- and Runyoro-translated Personal Health Questionnaire-9 (PHQ-9)

| Brief Item Description                        | Response Options <sup>a</sup> |             |           |           |
|-----------------------------------------------|-------------------------------|-------------|-----------|-----------|
|                                               | 0                             | 1           | 2         | 3         |
| <i>Luganda</i>                                |                               |             |           |           |
| 1 Little interest or pleasure in doing things | 397 (59.08)                   | 220 (32.74) | 35 (5.21) | 20 (2.98) |
| 2 Feeling down, depressed, or hopeless        | 402 (59.82)                   | 212 (31.55) | 38 (5.65) | 20 (2.98) |
| 3 Trouble falling or staying asleep           | 439 (65.33)                   | 161 (23.96) | 39 (5.80) | 33 (4.91) |
| 4 Feeling tired or having little energy       | 273 (40.63)                   | 317 (47.17) | 49 (7.29) | 33 (4.91) |
| 5 Poor appetite or overeating                 | 441 (65.63)                   | 169 (25.15) | 36 (5.36) | 26 (3.87) |
| 6 Feeling bad about yourself                  | 555 (82.59)                   | 85 (12.65)  | 17 (2.53) | 15 (2.23) |
| 7 Trouble concentrating on things             | 566 (84.23)                   | 84 (12.50)  | 13 (1.93) | 9 (1.34)  |
| 8 Moving or speaking slowly                   | 588 (87.50)                   | 65 (9.67)   | 10 (1.49) | 9 (1.34)  |
| 9 Thoughts that you would be better off dead  | 640 (95.24)                   | 26 (3.87)   | 3 (0.45)  | 3 (0.45)  |

*Runyoro*

|                                               |              |              |            |           |
|-----------------------------------------------|--------------|--------------|------------|-----------|
| 1 Little interest or pleasure in doing things | 1372 (59.73) | 802 (34.92)  | 85 (3.70)  | 38 (1.65) |
| 2 Feeling down, depressed, or hopeless        | 1572 (68.44) | 597 (25.99)  | 98 (4.27)  | 30 (1.31) |
| 3 Trouble falling or staying asleep           | 1221 (53.16) | 904 (39.36)  | 108 (4.70) | 64 (2.79) |
| 4 Feeling tired or having little energy       | 812 (35.35)  | 1254 (54.59) | 159 (6.92) | 72 (3.13) |
| 5 Poor appetite or overeating                 | 1300 (56.60) | 823 (35.83)  | 126 (5.49) | 48 (2.09) |
| 6 Feeling bad about yourself                  | 1862 (81.06) | 378 (16.46)  | 46 (2.00)  | 11 (0.48) |
| 7 Trouble concentrating on things             | 1751 (76.23) | 411 (17.89)  | 103 (4.48) | 32 (1.39) |
| 8 Moving or speaking slowly                   | 1870 (81.41) | 366 (15.93)  | 41 (1.78)  | 20 (0.87) |
| 9 Thoughts that you would be better off dead  | 2118 (92.21) | 156 (6.79)   | 21 (0.91)  | 2 (0.09)  |

---

<sup>a</sup> Response options in English: 0=not at all, 1=several days, 2=more than half the days, 3=nearly every day
